# Supplementary material for: Tuning spectral properties of phenothiazine based donor–π–acceptor dyes for efficient dye-sensitized solar cells
Source: Royal Society of Chemistry journal article supplement (doi:10.1039/c1jm14024h), 2011-11-14
Supplement: c1jm14024h.pdf [file c1jm14024h.pdf]

## Electronic Supporting Information

### Tuning spectral properties of phenothiazine based donor- $\pi$ -acceptor dyes for efficient dye-sensitized solar cells

Magdalena Marszalek,<sup>a</sup> Satyawan Nagane,<sup>b</sup> Amol Ichake<sup>b</sup>, Robin Humphry-Baker,<sup>a</sup> Vincent Paul<sup>\*b</sup> Shaik M. Zakeeruddin,<sup>\*a</sup> and Michael Grätzel<sup>\*a</sup>

<sup>a</sup>Laboratory for Photonics and Interfaces, Ecole Polytechnique Fédérale de Lausanne, 1015, Lausanne, Switzerland. E-mail: [shaik.zakeer@epfl.ch](mailto:shaik.zakeer@epfl.ch), [michael.gratzel@epfl.ch](mailto:michael.gratzel@epfl.ch) Fax: +41 (0)21 693 61 00; Tel: +41 (0)21 693 31 12;

<sup>b</sup> Room 288, Organic Chemistry Division, National Chemical Laboratory, Pashan Road, Pune 411008, India. E-mail: [vp.swamy@ncl.res.in](mailto:vp.swamy@ncl.res.in) Fax: +91 (0)20 2590 2629; Tel: +91 (0)20 2590 2286;

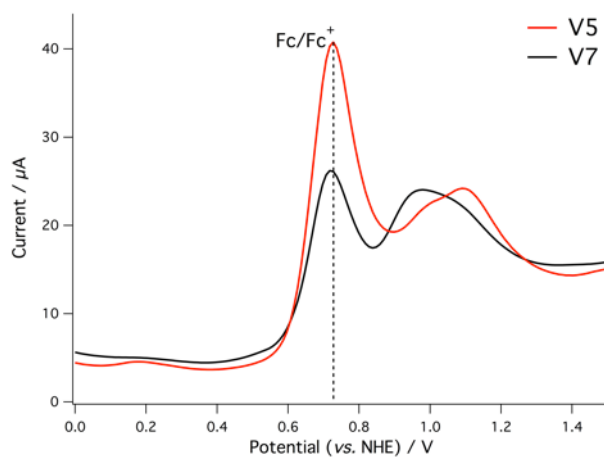

**Figure S 1** Differential pulse voltammograms of the dye V5 and V7 in DMF with a TBAPF<sub>6</sub> as a supporting electrolyte and ferrocene as an internal reference. A value of 0.72 V vs. NHE was taken as an oxidation potential of ferrocene and the plots were normalized accordingly.

**Table S1** The relative distance between the conduction band edge position and the quasi-Fermi level derived from the cell capacitance obtained via EIS measurement under 0.5 Sun.

| Dye | $E_C - E_{Fn} / \text{eV}$ |
|-----|----------------------------|
| V5  | 0.10                       |
| V7  | 0.11                       |

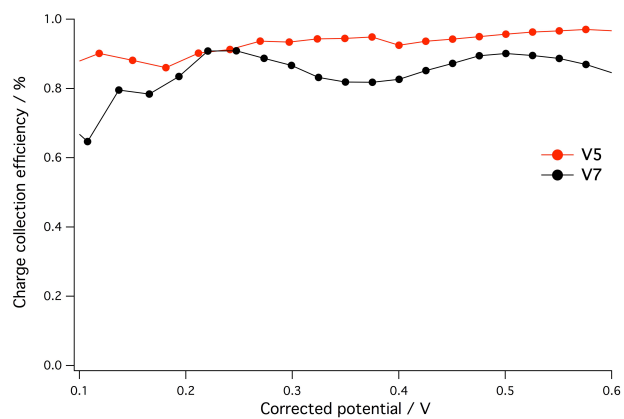

**Figure S2 Charge collection efficiency plots for the cells with V5 and V7 dyes obtained from EIS measurements under 0.5 Sun light intensity illumination.**
